# Supplementary material for: Spatiotemporal Fluctuation Analysis: A Powerful Tool for the Future Nanoscopy of Molecular Processes
Source: PubMed Central journal article supplement — Biophys J. 2016 Aug 23;111(4):679–85. doi: 10.1016/j.bpj.2016.07.015 (PMC5002078; doi:10.1016/j.bpj.2016.07.015), 2016-08-23
Supplement: mmc2.pdf [file mmc2.pdf]

# Spatiotemporal Fluctuation Analysis: A Powerful Tool for the Future Nanoscopy of Molecular Processes

Carmine Di Rienzo,<sup>1,2</sup> Enrico Gratton,<sup>3</sup> Fabio Beltram,<sup>1,2</sup> and Francesco Cardarelli<sup>2,\*</sup>

<sup>1</sup>NEST, Scuola Normale Superiore and Istituto Nanoscienze-CNR, Pisa, Italy; <sup>2</sup>Center for Nanotechnology Innovation @NEST, Istituto Italiano di Tecnologia, Pisa, Italy; and <sup>3</sup>Laboratory for Fluorescence Dynamics, Department of Biomedical Engineering, University of California, Irvine, California

**ABSTRACT** The enormous wealth of information available today from optical microscopy measurements on living samples is often underexploited. We argue that spatiotemporal analysis of fluorescence fluctuations using multiple detection channels can enhance the performance of current nanoscopy methods and provide further insight into dynamic molecular processes of high biological relevance.

A major challenge of present (and future) biophysics is to quantitatively study how biomolecules dynamically fulfill their physiological role in living cells, tissues, or entire organisms. Over the last few decades, many biophysical approaches have been developed to study crucial molecular parameters (e.g., localization, diffusion, binding, and oligomerization state) in living samples with high accuracy.

In particular, the perceived spatial-resolution limit of far-field optical microscopy has dramatically changed over the last 25 years (1). New experimental methodologies were introduced that are able to unveil details on a length scale that is a tiny fraction of the wavelength of light, thus moving spatial resolution far beyond the diffraction limit set by Ernst Abbe's equation (2). Available imaging methodologies can be grouped into three large families. The first family was proposed two decades ago and exploits the spectral properties of the fluorescent molecules under study to circumvent the diffraction limit, and comprises stimulated emission depletion (STED) (3), ground-state depletion (4), and reversible saturable optical fluorescence transition (5) microscopies. The second family includes strategies that improve spatial resolution by suitably shaping the excitation-light beam, as in the case of structured illumination microscopy (SIM) (6–9). The third approach affords super-resolution by combining selected spectral properties of the fluorescent molecules (e.g., photoactivation and on/

off switching) with single-molecule localization (SML) methods (also known as pointillistic strategies) such as stochastic optical reconstruction microscopy (10,11), photoactivated localization microscopy (PALM) (12), and point accumulation for imaging in nanoscale topography (13,14). All of these techniques are rapidly spreading and yielding exciting new discoveries in molecular/cellular biology and related fields. As compared with classical methods to approach the nanoscale, such as transmission electron microscopy, these strategies offer a pivotal advantage: they do not require fixed samples and consequently have the potential to reveal the nanoscale dynamic behavior of single molecules directly within living samples (see notable examples in Refs. (15–21)). In fact, several important biological applications can be found for each one of these nanoscopy families. For instance, in the context of SML methods, by combining PALM with single-particle tracking (SPT), one can build mobility maps by measuring the trajectories of many individual molecules at the same time (22). This multiplexed capability was successfully used, for instance, to dissect the dynamic behavior of  $\alpha$ -amino-3-hydroxy-5-methyl-4-isoxazolepropionic acid-type glutamate receptors at the postsynaptic density of live cells (23). Also, steady-state cross-correlation analysis of PALM-based super-resolution images yielded a model-independent and robust quantification of protein dynamics and codistributions both in vesicles and in live cells (24–26). Again in the context of SML approaches, it is worth mentioning the application of stochastic optical reconstruction microscopy in live samples to reveal the ultrastructural dynamics of various organelles (27), as well as in vitro to probe the

Submitted January 15, 2016, and accepted for publication July 14, 2016.

\*Correspondence: [francesco.cardarelli@iit.it](mailto:francesco.cardarelli@iit.it)

Editor: Brian Salzberg.

<http://dx.doi.org/10.1016/j.bpj.2016.07.015>

© 2016 Biophysical Society.

This is an open access article under the CC BY-NC-ND license (<http://creativecommons.org/licenses/by-nc-nd/4.0/>).

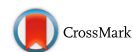

molecular exchange pathways in one-dimensional supra-molecular fibers (28). Concerning SIM-based nanoscopy methods, their recent combination with ultrahigh numerical aperture ( $NA \sim 1.7$ ) and reversibly photoswitchable fluorescent proteins (FPs) provided access to the sub-60-nm-resolution regime in applications at the plasma membrane level (29). This in turn allowed researchers to investigate with high accuracy a number of crucial molecular processes involved in the regulation of endocytic and cytoskeletal dynamics (29). Lastly, STED-based microscopy (applied in both single-point and scanning modes) was successfully used in combination with fluctuation spectroscopy to probe the dynamic behavior of single molecules at the appropriate temporal (microsecond-to-millisecond) and spatial (30–50 nm) resolution in several biological applications (30–38). Among others, in 2009, Eggeling and co-workers (30) used noninvasive optical recordings of fluorescence fluctuations at tunable spatial scales to study the dynamics of biomolecules on live-cell membranes. In particular, by tuning the probed area  $\sim 70$  times below the diffraction limit, they could directly observe sphingolipids and glycosylphosphatidylinositol-anchored proteins transiently trapped in cholesterol-mediated molecular complexes dwelling within  $< 20$ -nm-diameter areas. Interestingly, it was recently shown that the combination of raster-image correlation spectroscopy with STED offers an enhanced multiplexing capability because of the increased achievable spatial resolution (as compared with conventional raster-image correlation spectroscopy) as well as access to 10–100 times higher fluorophore concentrations (39). This combined approach was used to accurately map molecular dynamics on both model membranes and live cells (39).

### From static to dynamic resolution

In all of the examples discussed so far, the actual resolution of the measurement is determined by both the spatial and temporal scales at which the dynamic molecular process is actually probed. As recently noted by several experts in the field (40–42), there is a need for a paradigm shift in the classical concept of measurement resolution, i.e., a shift from the capability to distinguish two different molecules separated in space but fixed in time (hereafter referred to as static resolution) to the capability to distinguish two positions of the *same* molecule that are separated both in space and in time (hereafter termed dynamic resolution). In other words, in the presence of a dynamic process, the goal of the measurement would be to probe the spatiotemporal displacement of single molecules. From this new perspective, it is of interest to discuss the characteristic potential of each of the abovementioned nanoscopy families in detail. In a conventional SML-based experiment, for instance, a minimum number of photons (typically  $\sim 10$  photons) is required to properly perform single-molecule localization. Moreover, the localization precision ( $\sigma_{SML}$ ),

which is generally considered as the static spatial resolution of the measurement, depends on the square root of the number of collected photons ( $N_{\text{phs}}$ ). As a consequence, the brightness of the label directly determines the relationship between the static spatial and temporal resolution of the measurement (43). This relationship is reported in Fig. 1 A (*green solid lines*) for three representative brightness values, ranging from  $10^4$  photons/s (typical of an FP) to  $10^6$  photons/s (typical of a bright inorganic chromophore, such as a quantum dot). For instance, the minimum time required to localize a single FP with a 20-nm static spatial resolution is  $\sim 20$  ms (*dark blue line* in Fig. 1 A). By contrast, one can achieve a similar performance in 100-fold less time by using a 100-fold brighter chromophore (*cyan line* in Fig. 1 A). This scenario changes in the case of dynamic processes. In this case, the spatial scale that can be accessed is strongly influenced by the details of the dynamics. Three representative rates of (Brownian) motion are plotted in Fig. 1 A as solid yellow-to-red lines. For instance, a molecule diffusing at  $\sim 1 \mu\text{m}^2/\text{s}$  (*yellow solid line* in Fig. 1 A) will move  $\sim 20$  nm in 0.1 ms. As a consequence, the trajectory of the molecule cannot be described with a 20-nm dynamic resolution using FPs, as the time required for FP localization with such a resolution (i.e.,  $\sim 100$  ms) is much longer than the time it takes the molecules to move 20 nm. Please note that a single FP provides, on average,  $< 10$  photons in 0.1 ms (threshold indicated by *dashed black line* in Fig. 1 A), thus preventing molecular localization. By contrast, one can achieve a 20-nm dynamic spatial resolution by using an  $\sim 100$ -fold brighter label (*cyan solid line* in Fig. 1 A). In fact, in this case, a 20-nm static spatial resolution can be achieved before the molecule has moved  $\sim 20$  nm. Interestingly, in an intermediate case (e.g., an organic chromophore; *blue solid line* in Fig. 1 A), the molecule can be technically localized in 0.1 ms, but the achieved (static) spatial resolution is  $\sim 80$  nm. As a consequence, in this case, the molecular trajectory cannot be described with a 20-nm dynamic resolution. Note, however, that in principle, one can obtain the mean-square displacement (MSD) at 20-nm dynamic resolution by averaging multiple steps of a single-molecule trajectory and/or many single-molecule trajectories. All of these considerations are far more important with regard to molecules diffusing, for instance, in a three-dimensional intracellular environment, where molecular short-range motion shows diffusion coefficients of  $\sim 100 \mu\text{m}^2/\text{s}$  (*red solid line* in Fig. 1 A) (44). In these conditions, even a bright inorganic chromophore cannot afford a 20-nm dynamic resolution to describe the molecular trajectory or MSD. These limitations justify current intense efforts to search for improved chromophores and labeling methodologies (21,45–50).

As opposed to SML, both SIM- and STED-based strategies afford a static spatial resolution that is constant in time (Fig. 1, B and C). As an example, in the case of STED, the spatial scale at which the molecular dynamic

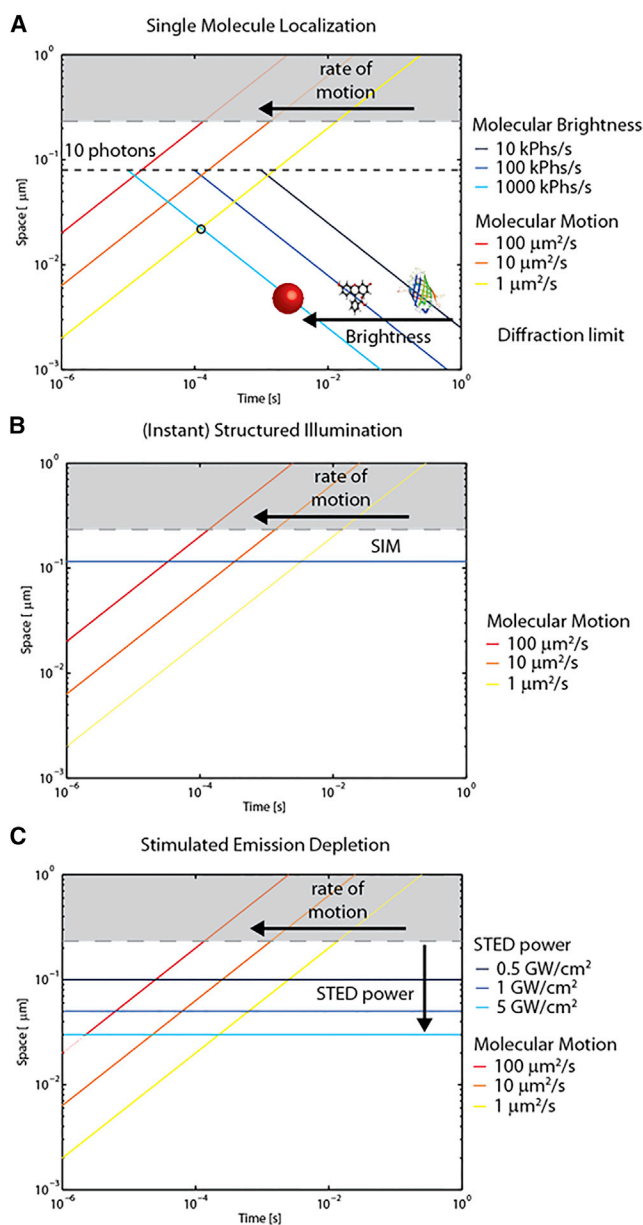

**FIGURE 1** Comparison between the static resolution of superresolution approaches and the temporal scale of molecular motion. (A) In SML methods, the relationship between spatial and temporal resolution is set by the brightness of the chromophore (*dark blue-to-cyan solid lines*; see [Supporting Materials and Methods](#) for further details). In fact, the brighter the chromophore, the shorter is the minimum time required to localize the single molecule. On the other side, the space explored by molecular motion increases in time according to the law of motion of the molecule (which is simplified here as a Brownian motion). The characteristic spatial scale of molecular displacement is identified as the square root of the expected MSD. Three representative diffusivities spanning from 0.1 to 100  $\mu\text{m}^2/\text{s}$  are pictured as yellow-to-red lines. Please note that 0.1  $\mu\text{m}^2/\text{s}$  well represents the slow diffusivity of membrane proteins, and 100  $\mu\text{m}^2/\text{s}$  well represents the fast diffusivity of soluble proteins. The maximum dynamic resolution of each selected label in describing a dynamic system is represented by the intercept between the corresponding brightness and rate-of-motion curves. (B) In a typical fluorescence-based SIM experiment, the sample is illuminated with a defined light pattern and the image is collected for each illumination structure. The illumination pattern defines where the sample is

behavior can be probed is invariably set by the efficiency of the depletion process, which, in the simplest case, depends on the power of the depletion beam (30). This in turn sets the size of the observation spot and hence the static resolution limit (Fig. 1 C) (30). Based on these general considerations, it is easy to understand why the dynamic spatial resolution of a SIM- or STED-based measurement can be limited only by the temporal resolution of the acquisition, which is constantly improving thanks to innovative technical solutions (Fig. 1, B and C) (42,51).

### Improving dynamic resolution by spatiotemporal correlation analysis

Despite the efforts described above, we argue that the arsenal of analytical tools at our disposal to measure the subresolution details of molecular motion in today's optical microscopy measurements is not fully exploited. In this regard, it is worth mentioning that the ability to resolve the dynamic behavior of molecules well below the nominal imaging resolution of the measurement ( $\sigma_{PSF}$ ) was demonstrated in recent years by the sole use of fluctuation analysis in standard diffraction-limited optical setups (29,44,52–56). For example, Shusterman and co-workers (52,53) derived an expression of the single-point fluorescence correlation spectroscopy correlation function, which is directly related to the molecular MSD. Using this approach, they measured the cuvette molecular displacements of fluorescently labeled DNA molecules with a 30-nm dynamic spatial resolution. For a while now, the theoretical basis underlying these results has been the subject of debate in the field of correlation spectroscopy (57,58). Interestingly, recent *in silico* and experimental results have further extended the possibility to probe the nanoscale dynamic behavior of molecules by means of spatiotemporal correlation spectroscopy in standard microscopy setups (44,55). For instance, by using an FP-tagged variant of Transferrin Receptor (TfR), we recently probed the regulation of protein diffusion imparted by the cytoskeleton meshwork on the plasma membrane of live cells (55). In particular, the diffusion law of TfR was reconstructed by spatiotemporal fluctuation spectroscopy at a temporal resolution of  $\sim 0.1$  ms. Thanks to this strategy, we were able to quantitatively describe subdiffraction confinement areas (with a linear length of  $\sim 100$  nm) in agreement with high-speed SPT (59). Of note, in our experiments, the achieved dynamic spatial resolution was

illuminated, and the image thus formed provides spatial information about the sample emission. This information provides a gain in resolution by a factor of  $\sim 2$ . On the other hand, the temporal resolution is set solely by the acquisition protocol that is applied. (C) In STED microscopy, the spatial resolution is set by the efficiency of the depletion of peripheral chromophores and, in the simplest case, it depends only on the power of the depletion beam. Also in this case, the temporal resolution is set by the acquisition protocol that is applied.

not determined solely by the imaging technology used (i.e., a standard, diffraction-limited setup with static resolution of  $\sim 250$  nm), but rather by the temporal scale at which the fluorescence signal was measured and by the signal/noise ratio achieved in the description of the correlation function. To better elucidate this crucial point, let us consider the case of the so-called imaging-derived MSD (or  $i$ MSD) approach applied to spatiotemporal image correlation spectroscopy (STICS) (44,55) (see Fig. S1 in the Supporting Material for further details). In STICS- $i$ MDS, the average displacement of many single molecules is measured as the increase in width of the spatiotemporal correlation function in time. As a consequence, the small-

est measurable average displacement is set by the precision that can be achieved in measuring the width of the correlation function ( $\sigma_{iMSD}$ ). To quantitatively illustrate this concept,  $\sigma_{iMSD}$  is quantified in Fig. 2 as a function of  $N_{phs}$  and molecular density ( $N_{mol}$ , the number of molecules per observation volume) in a classical time-lapse acquisition. First of all, by increasing  $N_{mol}$  from 0.01 to 10 molecules per point spread function (PSF), one can achieve a threefold improvement in the precision of the measurement regardless of the molecular brightness (*open versus solid black dots* in Fig. 2 A). Moreover, similarly to SML,  $\sigma_{iMSD}$  decreases according to the square root of  $N_{phs}$ , independently of  $N_{mol}$  (*solid lines* in Fig. 2 A). In

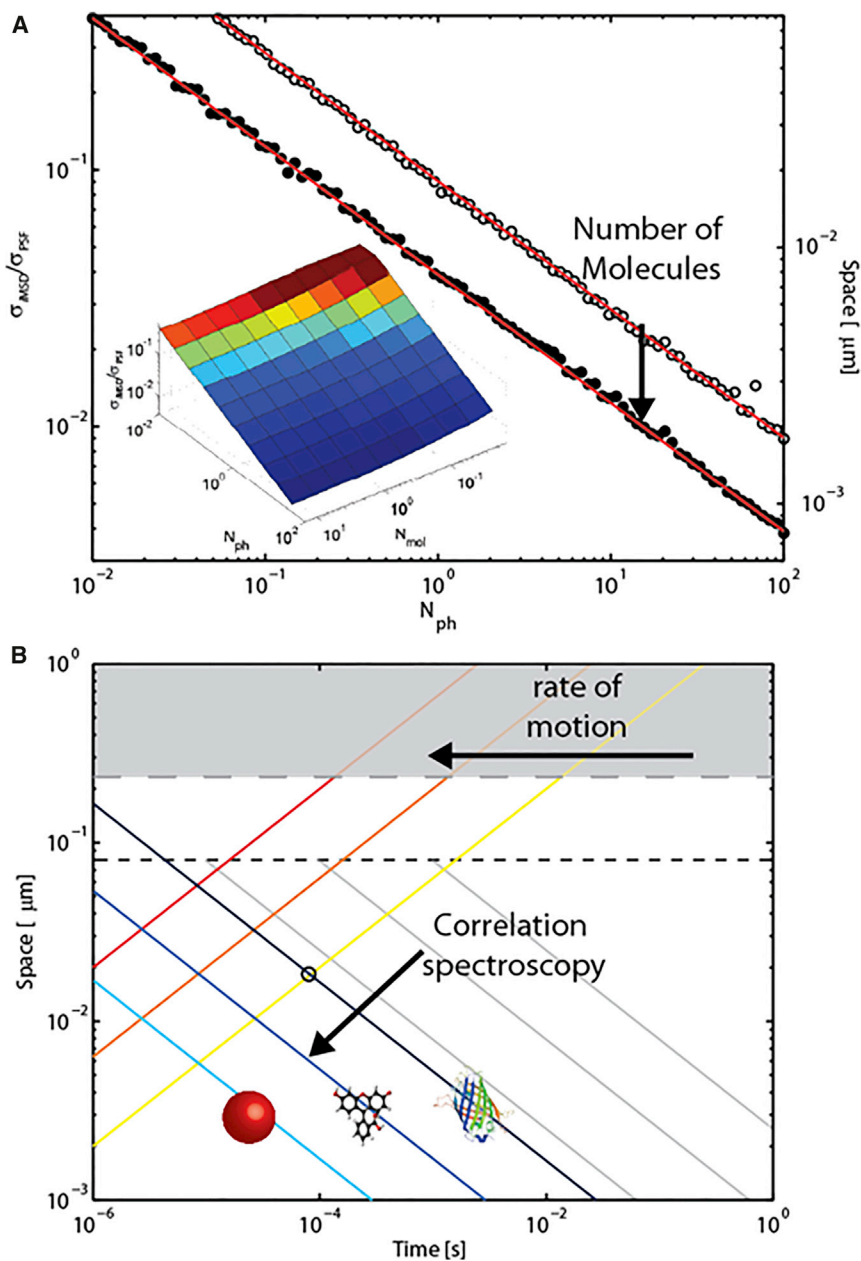

FIGURE 2 Precision in measuring the molecular MSD by correlation spectroscopy. (A)  $\sigma_{iMSD}$ , as defined in Supporting Materials and Methods, is quantified for a defined range of molecular brightness ( $N_{ph}$ , number of photons per molecule per frame) and molecular density ( $N_{mol}$ , number of molecules per PSF) values. In detail, the measured  $\sigma_{iMSD}$  is plotted against  $N_{ph}$  for the two selected brightness values of 0.1 and 10 molecules per PSF (*open and solid dots*, respectively). The red lines underline the dependence of  $\sigma_{iMSD}$  on the square root of  $N_{ph}$ . In the inset, a surface plot for all tested conditions is shown. (B) The same plot as in Fig. 1 A shows the contribution of spatiotemporal fluctuation analysis to the calculation of  $\sigma_{iMSD}$  as obtained from simulated experiments for three representative molecular brightness levels of 10, 100, and 1000 kPhs/s (*dark blue to cyan solid lines*).



general, a  $\sigma_{iMSD}$  of  $>20$  nm can be obtained in a wide range of conditions, even if individual molecules provide less than one photon per frame (cyan-to-blue portion of the surface plot in the inset of Fig. 2 A). This is possible thanks to spatiotemporal correlation spectroscopy, because the motion of many single molecules is averaged before (not after, as in SML-based experiments) their displacement is measured. This difference makes it possible to explore a temporal scale that is inaccessible to classical SML. By following this general strategy, in principle, one can push the dynamic spatial resolution of any optical microscopy measurement well below the limits imposed by its static spatial resolution (dashed gray line in Fig. 2 B) and by the temporal resolution needed for single-molecule localization (solid gray lines in Fig. 2 B). Such an approach may make it possible to probe TfR-GFP motion at the plasma membrane with a dynamic spatial resolution of  $\sim 20$  nm and a temporal resolution of  $\sim 0.1$  ms (55). These considerations regarding correlation spectroscopy are quite general and are not restricted to diffraction-limited setups. Therefore, we are asking, Can superresolution methods, which are intrinsically endowed with high static spatial resolution properties, take advantage of the resolution improvements that are accessible through spatiotemporal fluctuation analysis to describe dynamical processes? The answer is yes! We do believe that the time is ripe to push nanoscale investigations of dynamic processes to an entirely new level. To corroborate this statement, in the following we shall consider a recently reported set of superresolution experiments on dynamic biological processes. In particular, Schneider and co-workers (42) successfully combined STED-based imaging with electro-optical scanning technologies to obtain an unprecedented line-scanning frequency of 250 kHz. Using SPT and taking advantage of the 70-nm static resolution provided by STED, these authors investigated the dynamics of fluorescently labeled vesicles in living *Drosophila* or HIV-1 particles in cells with a temporal resolution of 5–10 ms (42). Such a platform appears ideal to show how the application of spatiotemporal fluctuation analysis can push the dynamic spatial resolution of a measurement well below the imaging nominal resolution, thus shedding light on unexplored dynamic phenomena such as the behavior of fluorescently labeled molecules trapped inside a vesicle. To illustrate this, in Fig. 3 we reproduce a set of analogous data from a simulated experiment in which fluorescent molecules can move within a vesicle that is comparable in size to the static spatial resolution of the measurement. The simulated image series is used to reconstruct the  $iMSD$  profile of fluorescent molecules (as described in Ref. (55); see also Fig. S1). Fig. 3 shows that by means of spatiotemporal fluorescence correlation spectroscopy, one can access the motion of fluorescent molecules trapped within moving vesicles and thus fully exploit information collected on timescales up to micro-

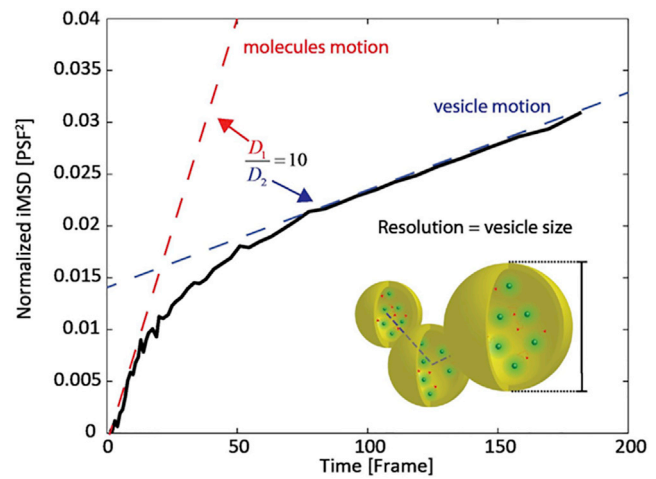

FIGURE 3 Spatiotemporal fluctuation analysis can superresolve single-molecule dynamics: a simulated experiment. A three-dimensional moving spherical object (in this case, a vesicle) with a diameter corresponding to the nominal measurement resolution (PSF) is filled with fluorescent molecules (see drawing in the inset). Both the vesicle and the molecules are free to diffuse, but the latter are 10 times faster than the vesicle and cannot cross the imposed spherical boundary. By applying spatiotemporal analysis of fluorescence fluctuations, one can measure the motion of the molecules within the vesicle (red dashed line) and the motion of the vesicle (blue dashed line) concomitantly, even if both are significantly smaller than the nominal imaging resolution. Further details about the simulations and data analysis are reported in [Supporting Materials and Methods](#).

seconds, which can be easily reached in a line-scanning acquisition with the aforementioned technology. In more detail, the  $iMSD$  plot displays two different diffusive regimes: a short-range diffusion that quantitatively describes the motion of molecules within the vesicle, and a 10-fold slower, long-range diffusion that reflects the movement of the entire vesicle. Both of these regimes match the imposed values. What is of importance here is that by applying spatiotemporal fluctuation analysis, we can resolve the dynamic behavior of molecules within a sub-micrometric environment with a dynamic spatial resolution of  $\sim 7$  nm, a limit that is actually 10 times smaller than the nominal static spatial resolution set by the STED experimental conditions.

In the words of Stefan Hell (2014 Nobel Laureate in Chemistry) and Steffen Sahl, “We envision several important developments going forward, of which the main thrusts are clear: we wish to move more and more toward real-time, four-dimensional (4D) molecular analysis not only in cells, but tissue-like preparations or tissues themselves” (1). Such an ambitious task will obviously entail efforts on many levels. We argue here that extending fluctuation analysis to the spatial dimension is the key to unraveling the dynamic behavior of molecules well below the nominal imaging resolution, down to the nanoscale. Using spatiotemporal fluctuation analysis, we can definitely integrate the arsenal of methods at our disposal to investigate living matter at the molecular level.

## SUPPORTING MATERIAL

Supporting Materials and Methods and one figure are available at [http://www.biophysj.org/biophysj/supplemental/S0006-3495\(16\)30578-1](http://www.biophysj.org/biophysj/supplemental/S0006-3495(16)30578-1).

## AUTHOR CONTRIBUTIONS

C.D.R. performed research, contributed analytic tools, analyzed data, and wrote the manuscript. E.G. and F.B. designed research and wrote the manuscript. F.C. designed and performed research, analyzed data, and wrote the manuscript.

## ACKNOWLEDGMENTS

We thank Dr. Vincenzo Piazza for useful discussions.

## REFERENCES

- Hell, S. W., S. J. Sahl, ..., P. Tinnefeld. 2015. The 2015 super-resolution microscopy roadmap. *J. Phys. D Appl. Phys.* 48:443001.
- Abbe, E. 1873. Beiträge zur Theorie des Mikroskops und der mikroskopischen Wahrnehmung. *Arch. F. Microsc. Anat.* 9:413–418.
- Hell, S. W., and J. Wichmann. 1994. Breaking the diffraction resolution limit by stimulated emission: stimulated-emission-depletion fluorescence microscopy. *Opt. Lett.* 19:780–782.
- Hell, S. W., and M. Kroug. 1995. Ground-state-depletion fluorescence microscopy: a concept for breaking the diffraction resolution limit. *Appl. Phys. B.* 60:495–497.
- Hell, S., S. Jakobs, and L. Kastrop. 2003. Imaging and writing at the nanoscale with focused visible light through saturable optical transitions. *Appl. Phys. A Mater. Sci. Process.* 77:859–860.
- Heintzmann, R., and C. G. Cremer. 1999. Laterally modulated excitation microscopy: improvement of resolution by using a diffraction grating. *Proc. SPIE.* 3568:185–196.
- Chung, E., D. Kim, ..., P. T. So. 2007. Two-dimensional standing wave total internal reflection fluorescence microscopy: superresolution imaging of single molecular and biological specimens. *Biophys. J.* 93:1747–1757.
- Gustafsson, M. G., L. Shao, ..., J. W. Sedat. 2008. Three-dimensional resolution doubling in wide-field fluorescence microscopy by structured illumination. *Biophys. J.* 94:4957–4970.
- Axelrod, D. 2013. Evanescent excitation and emission in fluorescence microscopy. *Biophys. J.* 104:1401–1409.
- Rust, M. J., M. Bates, and X. Zhuang. 2006. Sub-diffraction-limit imaging by stochastic optical reconstruction microscopy (STORM). *Nat. Methods.* 3:793–795.
- Mukamel, E. A., H. Babcock, and X. Zhuang. 2012. Statistical deconvolution for superresolution fluorescence microscopy. *Biophys. J.* 102:2391–2400.
- Betzig, E., G. H. Patterson, ..., H. F. Hess. 2006. Imaging intracellular fluorescent proteins at nanometer resolution. *Science.* 313:1642–1645.
- Sharonov, A., and R. M. Hochstrasser. 2006. Wide-field subdiffraction imaging by accumulated binding of diffusing probes. *Proc. Natl. Acad. Sci. USA.* 103:18911–18916.
- Giannone, G., E. Hosy, ..., L. Cognet. 2010. Dynamic superresolution imaging of endogenous proteins on living cells at ultra-high density. *Biophys. J.* 99:1303–1310.
- Shao, L., P. Kner, ..., M. G. Gustafsson. 2011. Super-resolution 3D microscopy of live whole cells using structured illumination. *Nat. Methods.* 8:1044–1046.
- Jones, S. A., S. H. Shim, ..., X. Zhuang. 2011. Fast, three-dimensional super-resolution imaging of live cells. *Nat. Methods.* 8:499–508.
- Shroff, H., C. G. Galbraith, ..., E. Betzig. 2008. Live-cell photoactivated localization microscopy of nanoscale adhesion dynamics. *Nat. Methods.* 5:417–423.
- Kiuchi, T., M. Higuchi, ..., N. Watanabe. 2015. Multitarget super-resolution microscopy with high-density labeling by exchangeable probes. *Nat. Methods.* 12:743–746.
- Fölling, J., M. Bossi, ..., S. W. Hell. 2008. Fluorescence nanoscopy by ground-state depletion and single-molecule return. *Nat. Methods.* 5:943–945.
- Willig, K. I., R. R. Kellner, ..., S. W. Hell. 2006. Nanoscale resolution in GFP-based microscopy. *Nat. Methods.* 3:721–723.
- Tiwari, D. K., Y. Arai, ..., T. Nagai. 2015. A fast- and positively photo-switchable fluorescent protein for ultralow-laser-power RESOLFT nanoscopy. *Nat. Methods.* 12:515–518.
- Manley, S., J. M. Gillette, ..., J. Lippincott-Schwartz. 2008. High-density mapping of single-molecule trajectories with photoactivated localization microscopy. *Nat. Methods.* 5:155–157.
- Hoze, N., D. Nair, ..., D. Holcman. 2012. Heterogeneity of AMPA receptor trafficking and molecular interactions revealed by superresolution analysis of live cell imaging. *Proc. Natl. Acad. Sci. USA.* 109:17052–17057.
- Semrau, S., and T. Schmidt. 2007. Particle image correlation spectroscopy (PICS): retrieving nanometer-scale correlations from high-density single-molecule position data. *Biophys. J.* 92:613–621.
- Semrau, S., L. Holtzer, ..., T. Schmidt. 2011. Quantification of biological interactions with particle image cross-correlation spectroscopy (PICCS). *Biophys. J.* 100:1810–1818.
- Stone, M. B., and S. L. Veatch. 2015. Steady-state cross-correlations for live two-colour super-resolution localization data sets. *Nat. Commun.* 6:7437.
- Shim, S.-H., C. Xia, ..., X. Zhuang. 2012. Super-resolution fluorescence imaging of organelles in live cells with photoswitchable membrane probes. *Proc. Natl. Acad. Sci. USA.* 109:13978–13983.
- Albertazzi, L., D. van der Zwaag, ..., E. W. Meijer. 2014. Probing exchange pathways in one-dimensional aggregates with super-resolution microscopy. *Science.* 344:491–495.
- Storti, B., C. Di Rienzo, ..., F. Beltram. 2015. Unveiling TRPV1 spatiotemporal organization in live cell membranes. *PLoS One.* 10:e0116900.
- Eggeling, C., C. Ringemann, ..., S. W. Hell. 2009. Direct observation of the nanoscale dynamics of membrane lipids in a living cell. *Nature.* 457:1159–1162.
- Vicidomini, G., G. Moneron, ..., S. W. Hell. 2011. Sharper low-power STED nanoscopy by time gating. *Nat. Methods.* 8:571–573.
- Mueller, V., C. Ringemann, ..., C. Eggeling. 2011. STED nanoscopy reveals molecular details of cholesterol- and cytoskeleton-modulated lipid interactions in living cells. *Biophys. J.* 101:1651–1660.
- Göttfert, F., C. A. Wurm, ..., S. W. Hell. 2013. Coaligned dual-channel STED nanoscopy and molecular diffusion analysis at 20 nm resolution. *Biophys. J.* 105:L01–L03.
- Honigmann, A., V. Mueller, ..., C. Eggeling. 2014. Scanning STED-FCS reveals spatiotemporal heterogeneity of lipid interaction in the plasma membrane of living cells. *Nat. Commun.* 5:5412.
- Vicidomini, G., H. Ta, ..., C. Eggeling. 2015. STED-FLCS: an advanced tool to reveal spatiotemporal heterogeneity of molecular membrane dynamics. *Nano Lett.* 15:5912–5918.
- Andrade, D. M., M. P. Clausen, ..., C. Eggeling. 2015. Cortical actin networks induce spatio-temporal confinement of phospholipids in the plasma membrane—a minimally invasive investigation by STED-FCS. *Sci. Rep.* 5:11454.
- Benda, A., Y. Ma, and K. Gaus. 2015. Self-calibrated line-scan STED-FCS to quantify lipid dynamics in model and cell membranes. *Biophys. J.* 108:596–609.
- Bianchini, P., F. Cardarelli, ..., R. Bizzarri. 2014. Nanoscale protein diffusion by STED-based pair correlation analysis. *PLoS One.* 9:e99619.

39. Hedde, P. N., R. M. Dörlich, ..., G. U. Nienhaus. 2013. Stimulated emission depletion-based raster image correlation spectroscopy reveals biomolecular dynamics in live cells. *Nat. Commun.* 4:2093.
40. Ritchie, K., X. Y. Shan, ..., A. Kusumi. 2005. Detection of non-Brownian diffusion in the cell membrane in single molecule tracking. *Biophys. J.* 88:2266–2277.
41. Kusumi, A., Y. M. Shirai, ..., T. K. Fujiwara. 2010. Hierarchical organization of the plasma membrane: investigations by single-molecule tracking vs. fluorescence correlation spectroscopy. *FEBS Lett.* 584:1814–1823.
42. Schneider, J., J. Zahn, ..., S. W. Hell. 2015. Ultrafast, temporally stochastic STED nanoscopy of millisecond dynamics. *Nat. Methods.* 12:827–830.
43. Thompson, R. E., D. R. Larson, and W. W. Webb. 2002. Precise nanometer localization analysis for individual fluorescent probes. *Biophys. J.* 82:2775–2783.
44. Di Rienzo, C., V. Piazza, ..., F. Cardarelli. 2014. Probing short-range protein Brownian motion in the cytoplasm of living cells. *Nat. Commun.* 5:5891.
45. Grimm, J. B., B. P. English, ..., L. D. Lavis. 2015. A general method to improve fluorophores for live-cell and single-molecule microscopy. *Nat. Methods.* 12:244–250, 3, 250.
46. McKinney, S. A., C. S. Murphy, ..., L. L. Looger. 2009. A bright and photostable photoconvertible fluorescent protein. *Nat. Methods.* 6:131–133.
47. Dempsey, G. T., J. C. Vaughan, ..., X. Zhuang. 2011. Evaluation of fluorophores for optimal performance in localization-based super-resolution imaging. *Nat. Methods.* 8:1027–1036.
48. Smith, C. 2007. Keeping tabs on fluorescent tags. *Nat. Methods.* 4:755–761.
49. Durisic, N., L. Laparra-Cuervo, ..., M. Lakadamyali. 2014. Single-molecule evaluation of fluorescent protein photoactivation efficiency using an in vivo nanotemplate. *Nat. Methods.* 11:156–162.
50. Wombacher, R., M. Heidbreder, ..., M. Sauer. 2010. Live-cell super-resolution imaging with trimethoprim conjugates. *Nat. Methods.* 7:717–719.
51. York, A. G., P. Chandris, ..., H. Shroff. 2013. Instant super-resolution imaging in live cells and embryos via analog image processing. *Nat. Methods.* 10:1122–1126.
52. Shusterman, R., S. Alon, ..., O. Krichevsky. 2004. Monomer dynamics in double- and single-stranded DNA polymers. *Phys. Rev. Lett.* 92:048303.
53. Shusterman, R., T. Gavrinov, and O. Krichevsky. 2008. Internal dynamics of superhelical DNA. *Phys. Rev. Lett.* 100:098102.
54. Hebert, B., S. Costantino, and P. W. Wiseman. 2005. Spatiotemporal image correlation spectroscopy (STICS) theory, verification, and application to protein velocity mapping in living CHO cells. *Biophys. J.* 88:3601–3614.
55. Di Rienzo, C., E. Gratton, ..., F. Cardarelli. 2013. Fast spatiotemporal correlation spectroscopy to determine protein lateral diffusion laws in live cell membranes. *Proc. Natl. Acad. Sci. USA.* 110:12307–12312.
56. Di Rienzo, C., E. Gratton, F. Beltram, and F. Cardarelli. 2014. From fast fluorescence imaging to molecular diffusion law on live cell membranes in a commercial microscope. *J. Vis. Exp.* 92:e51994.
57. Enderlein, J. 2012. Polymer dynamics, fluorescence correlation spectroscopy, and the limits of optical resolution. *Phys. Rev. Lett.* 108:108101.
58. Krichevsky, O. 2013. Comment on “Polymer dynamics, fluorescence correlation spectroscopy, and the limits of optical resolution”. *Phys. Rev. Lett.* 110:159801.
59. Kusumi, A., C. Nakada, ..., T. Fujiwara. 2005. Paradigm shift of the plasma membrane concept from the two-dimensional continuum fluid to the partitioned fluid: high-speed single-molecule tracking of membrane molecules. *Annu. Rev. Biophys. Biomol. Struct.* 34:351–378.

**Biophysical Journal, Volume 111**

**Supplemental Information**

**Spatiotemporal Fluctuation Analysis: A Powerful Tool for the Future  
Nanoscopy of Molecular Processes**

**Carmine Di Rienzo, Enrico Gratton, Fabio Beltram, and Francesco Cardarelli**



## Supporting Materials and Methods

### Estimation of temporal resolution in SML experiments

In SML experiments, the localization precision ( $\sigma_{SML}$ ) depends on the number of collected photons ( $N_{phs}$ ) and on the imaging resolution (i.e. the single-molecule spot size,  $\sigma_{PSF}$ ) according to (see also Ref. [43] in the main text):

$$\sigma_{SML}^2 = \frac{\sigma_{PSF}^2}{N_{phs}}. \quad (S1)$$

At this point, if we define the molecular brightness as the rate of photons collection from each single molecule,  $B = N_{phs}/t$ , then Eq. S1 can be rewritten as:

$$\sigma_{SML}^2 = \frac{\sigma_{PSF}^2}{Bt}, \quad (S2)$$

indicating that, given a certain brightness of the label, the achievable resolution ( $\sigma_{SML}$ ) is set by the acquisition time  $t$ . Equation S2 is represented in Fig. 1A for the 3 representative brightness of 10, 100 and 1000 kPhs/s.

### Estimation of precision in fitting the width of the correlation function

Following previous results, we define the STICS correlation function as (see also Ref. [54] in the main text):

$$G(\xi, \psi, \tau) = \frac{\langle I(x,y,t) \cdot I(x+\xi, y+\psi, t+\tau) \rangle}{\langle I(x,y,t) \rangle^2} - 1, \quad (S3)$$

where  $I(x,y,t)$  is the fluorescence intensity measured in the position  $x,y$  at time  $t$  and  $\xi, \psi$  and  $\tau$  are the spatial and temporal lags, respectively. In the *i*MSD approach, the STICS correlation function is approximated to a gaussian function defined as (see also Ref. [44] in the main text):

$$G(\xi, \psi, \tau) = g(\tau) \exp\left(-\frac{\xi^2 + \psi^2}{\sigma_r^2(\tau)}\right) + g_\infty(\tau), \quad (S4)$$

where  $g(\tau)$  and  $g_\infty(\tau)$  represent the amplitude and the offset of the correlation function, respectively, and

$$\sigma_r^2(\tau) = MSD(\tau) + \sigma_0^2. \quad (\text{S5})$$

In particular, in the case of immobile molecules  $MSD(\tau) = 0$ . In this case,  $\sigma_r^2(\tau)$  is expected to be constant and the residual variance can be used to estimate the precision of the fitting procedure. Thus, we simulated the STICS correlation function of immobile molecules by varying the number of molecules and the number of photons collected from each molecule. In brief, a time-series of 1000 frames, 256x256 pixels wide is simulated. First, a variable number of molecules are randomly seeded in the simulated space. Then, for each simulated frame, a random number of photons is associated with each molecule according to the chosen molecular brightness by using a Poissonian distributed random number generator. Finally, the actual position at which each photon is collected can be obtained by adding a random number drawn from a Gaussian distribution to the molecular position in both the spatial directions, with a full-width-at-half-maximum (FWHM) equal to the imposed imaging resolution (that in turn corresponds to 3 simulated pixels). The obtained image series is used to calculate the STICS correlation function according to Eq. S3. Then, fitting to Eq. S4 enables to obtain  $\sigma_r^2(\tau)$ . Finally, we estimate  $\sigma_{iMSD}^2$  as the standard deviation of  $\sigma_r^2(\tau)$ .

### **Simulation of particles diffusing within moving vesicles**

A time-series of 8000 frames, 256x256 pixels wide is simulated. In order to simulate the diffusion of particles trapped inside a vesicle, we simulated an empty sphere containing 10 point-like objects. The radius of the sphere is set equal to the imaging resolution in the radial plane ( $\sigma_{PSF}$ ), that in turn corresponds to 3 simulated pixels. 150 spheres were randomly seeded in the 3D simulated box (256,256,64 pixels in x,y and z direction, respectively, where the focal plane is set in the middle of the simulated volume). 3D Brownian motion is simulated both for the trapped point-like objects and for the whole sphere (the vesicle). In particular, the point-like objects are let free to diffuse inside the sphere with a diffusivity  $D_1=10^{-3} \sigma_{PSF}^2/\text{frame}$ , while the sphere is let free to diffuse inside the simulated box with  $D_2=D_1/10$ . The motion of the point-like objects is limited inside the sphere by applying reflective boundaries at the sphere surface. Moreover, circular boundaries are applied to the motion of the spheres. Simulated frames are then obtained, as described above, by setting the brightness of each point-like object to 0.1 photons per frame (when objects are in the focal plane).

## Supporting Figure 1

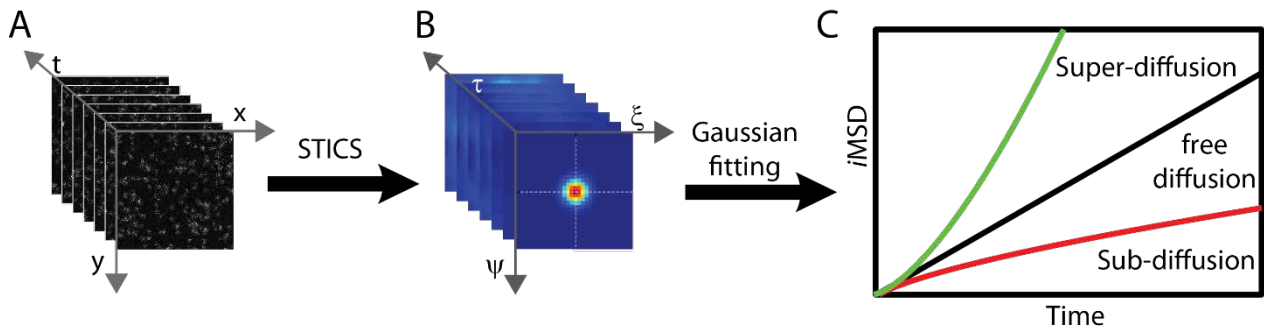

**Supporting Figure 1.** Measuring molecular displacement by the *iMSD* approach. (A) First, an image series of the sample is collected, in order to map the spatial and temporal fluctuations of the fluorescence intensity. (B) By calculating the STICS correlation function, all the measured fluorescence fluctuations are averaged together before measuring the molecular displacement. (C) Through the Gaussian fitting of the STICS correlation function at different time delays the average molecular displacement is directly measured in the form of an image-derived Mean Square Displacement or *iMSD*. By plotting the recovered *iMSD* vs time, free diffusion can be easily distinguished from both sub-diffusive and super-diffusive behavior. Further details can be found in Refs. [54,55] of the main text.
